# Supplementary material for: Alcohol intake and stomach cancer risk in Japan: A pooled analysis of six cohort studies
Source: PubMed Central journal article supplement — Cancer Sci. 2021 Nov 28;113(1):261–76. doi: 10.1111/cas.15172 (PMC8748227; doi:10.1111/cas.15172), 2021-11-28
Supplement: CAS-113-261-s001.pdf [file CAS-113-261-s001.pdf]

**Supplementary TABLE 3** Results from a pooled analysis using a random-effects model for stomach cancer incidence according to alcohol intake by smoking status in Japanese men, 1988–2014

|                                                            | Total  | Nondrinkers      | Occasional drinkers<br>(<once/week) | Regular drinkers (≥once/week) |                  |                  |                  |                  | <i>p</i> for heterogeneity<br>for the highest category <sup>f</sup> | Alcohol intake as a continuous variable (per 10 g/day) |                    |                                         |  |
|------------------------------------------------------------|--------|------------------|-------------------------------------|-------------------------------|------------------|------------------|------------------|------------------|---------------------------------------------------------------------|--------------------------------------------------------|--------------------|-----------------------------------------|--|
|                                                            |        |                  |                                     | <23 g/day                     | 23 to <46 g/day  | 46 to <69 g/day  | 69 to <92 g/day  | ≥92 g/day        |                                                                     | HR (95% CI)                                            | <i>p</i> for trend | <i>p</i> for heterogeneity <sup>f</sup> |  |
| <b>Nonsmokers</b>                                          |        |                  |                                     |                               |                  |                  |                  |                  |                                                                     |                                                        |                    |                                         |  |
| No. of subjects                                            | 24,704 | 7,266            | 2,391                               | 5,582                         | 4,634            | 2,955            | 1,152            | 724              |                                                                     |                                                        |                    |                                         |  |
| No. of cases                                               | 873    | 278              | 57                                  | 190                           | 180              | 103              | 40               | 25               |                                                                     |                                                        |                    |                                         |  |
| Age- and area-adjusted HR (95% CI) as model 1 <sup>a</sup> |        | 1.00 (reference) | 0.84 (0.50–1.42)                    | 0.97 (0.70–1.35)              | 1.09 (0.90–1.32) | 0.90 (0.72–1.14) | 1.02 (0.69–1.49) | 1.35 (0.83–2.20) | 0.334                                                               | 1.015 (0.990–1.041)                                    | 0.231              | 0.210                                   |  |
| Multivariate-adjusted HR (95% CI) in model 2 <sup>b</sup>  |        | 1.00 (reference) | 0.84 (0.50–1.43)                    | 0.97 (0.70–1.35)              | 1.08 (0.89–1.31) | 0.90 (0.71–1.13) | 1.02 (0.69–1.50) | 1.35 (0.82–2.24) | 0.316                                                               | 1.015 (0.991–1.041)                                    | 0.220              | 0.217                                   |  |
| Multivariate-adjusted HR (95% CI) in model 3 <sup>c</sup>  |        | 1.00 (reference) | 0.75 (0.55–1.03)                    | 0.88 (0.72–1.08)              | 1.03 (0.82–1.28) | 0.84 (0.66–1.08) | 1.01 (0.70–1.45) | 1.22 (0.77–1.94) | 0.702                                                               | 1.025 (1.014–1.037)                                    | <0.001             | 0.421                                   |  |
| Multivariate-adjusted HR (95% CI) in model 4 <sup>d</sup>  |        | 1.00 (reference) | 0.78 (0.42–1.44)                    | 0.90 (0.66–1.24)              | 1.04 (0.82–1.32) | 0.89 (0.69–1.13) | 0.96 (0.65–1.40) | 1.07 (0.65–1.75) | 0.915                                                               | 1.007 (0.975–1.040)                                    | 0.656              | 0.123                                   |  |
| Multivariate-adjusted HR (95% CI) in model 5 <sup>e</sup>  |        | 1.00 (reference) | 0.72 (0.48–1.06)                    | 0.86 (0.69–1.06)              | 1.01 (0.80–1.27) | 0.82 (0.63–1.07) | 0.94 (0.64–1.38) | 1.07 (0.64–1.79) | 0.971                                                               | 1.023 (1.010–1.037)                                    | <0.001             | 0.489                                   |  |
| <b>Ever smokers</b>                                        |        |                  |                                     |                               |                  |                  |                  |                  |                                                                     |                                                        |                    |                                         |  |
| No. of subjects                                            | 93,230 | 21,911           | 5,830                               | 16,031                        | 19,450           | 17,593           | 8,310            | 4,105            |                                                                     |                                                        |                    |                                         |  |
| No. of cases                                               | 5,066  | 1,160            | 279                                 | 782                           | 1,061            | 1,085            | 486              | 213              |                                                                     |                                                        |                    |                                         |  |
| Age- and area-adjusted HR (95% CI) as model 1 <sup>a</sup> |        | 1.00 (reference) | 1.04 (0.87–1.23)                    | 0.98 (0.88–1.10)              | 1.08 (0.99–1.18) | 1.22 (1.11–1.35) | 1.24 (1.05–1.48) | 1.32 (1.12–1.55) | 0.363                                                               | 1.028 (1.012–1.044)                                    | 0.001              | 0.001                                   |  |
| Multivariate-adjusted HR (95% CI) in model 2 <sup>b</sup>  |        | 1.00 (reference) | 1.04 (0.88–1.23)                    | 0.99 (0.89–1.11)              | 1.09 (1.00–1.19) | 1.22 (1.11–1.36) | 1.23 (1.04–1.47) | 1.30 (1.11–1.53) | 0.386                                                               | 1.026 (1.011–1.041)                                    | 0.001              | 0.002                                   |  |
| Multivariate-adjusted HR (95% CI) in model 3 <sup>c</sup>  |        | 1.00 (reference) | 1.09 (0.94–1.27)                    | 0.99 (0.87–1.12)              | 1.07 (0.98–1.17) | 1.18 (1.08–1.30) | 1.19 (1.00–1.42) | 1.24 (1.05–1.47) | 0.467                                                               | 1.020 (1.005–1.036)                                    | 0.010              | 0.018                                   |  |
| Multivariate-adjusted HR (95% CI) in model 4 <sup>d</sup>  |        | 1.00 (reference) | 1.08 (0.90–1.29)                    | 0.99 (0.90–1.10)              | 1.09 (1.00–1.20) | 1.25 (1.12–1.39) | 1.27 (1.06–1.52) | 1.29 (1.09–1.53) | 0.533                                                               | 1.023 (1.009–1.036)                                    | 0.001              | 0.031                                   |  |
| Multivariate-adjusted HR (95% CI) in model 5 <sup>e</sup>  |        | 1.00 (reference) | 1.14 (0.97–1.33)                    | 0.99 (0.89–1.10)              | 1.06 (0.96–1.17) | 1.20 (1.08–1.32) | 1.20 (1.02–1.41) | 1.22 (1.02–1.46) | 0.486                                                               | 1.016 (1.003–1.030)                                    | 0.019              | 0.096                                   |  |

<sup>a</sup>Adjusted for age and area (JPHC Study I, JPHC Study II, JACC Study, and Life Span Study only).

<sup>b</sup>Adjusted for covariates in model 1 plus smoking status (only for ever smokers, pack-years: <20, 20 to <40, and ≥40) and medical history of diabetes mellitus (yes, no).

<sup>c</sup>Adjusted for covariates in model 2 plus total energy intake (quartiles), vegetable intake (quartiles), fruit intake (quartiles), salt intake (quartiles), and green tea consumption (cups/day: <1, 1–2, 3–4, and ≥5).

<sup>d</sup>Excluding participants with stomach cancer diagnosis within 3 years from the baseline in model 2.

<sup>e</sup>Excluding participants with stomach cancer diagnosis within 3 years from the baseline in model 3.

<sup>f</sup>Indicating heterogeneity among the pooled cohort studies.

Abbreviations: CI, confidence interval; HR, hazard ratio; JACC Study, the Japan Collaborative Cohort Study; JPHC Study, the Japan Public Health Center-based Prospective Study.
