# Supplementary material for: Alcohol intake and stomach cancer risk in Japan: A pooled analysis of six cohort studies
Source: PubMed Central journal article supplement — Cancer Sci. 2021 Nov 28;113(1):261–76. doi: 10.1111/cas.15172 (PMC8748227; doi:10.1111/cas.15172), 2021-11-28
Supplement: CAS-113-261-s002.pdf [file CAS-113-261-s002.pdf]

**Supplementary TABLE 4** Results from a pooled analysis using a random-effects model for stomach cancer incidence according to alcohol intake by smoking status in Japanese men, 1988–2014, separating former drinkers from nondrinkers

|                                                            | Total  | Nondrinkers      | Former drinkers  | Occasional drinkers<br>( $<1$ once/week) | Regular drinkers ( $\geq 1$ once/week) |                   |                   |                   |                  | $p$ for heterogeneity<br>for the highest category <sup>f</sup> | Alcohol intake as a continuous variable (per 10 g/day) |               |                                    |
|------------------------------------------------------------|--------|------------------|------------------|------------------------------------------|----------------------------------------|-------------------|-------------------|-------------------|------------------|----------------------------------------------------------------|--------------------------------------------------------|---------------|------------------------------------|
|                                                            |        |                  |                  |                                          | $<23$ g/day                            | 23 to $<46$ g/day | 46 to $<69$ g/day | 69 to $<92$ g/day | $\geq 92$ g/day  |                                                                | HR (95% CI)                                            | $p$ for trend | $p$ for heterogeneity <sup>f</sup> |
| <b>Nonsmokers</b>                                          |        |                  |                  |                                          |                                        |                   |                   |                   |                  |                                                                |                                                        |               |                                    |
| No. of subjects                                            | 19,844 | 5,018            | 1,002            | 1,676                                    | 5,216                                  | 3,560             | 2,256             | 720               | 396              |                                                                |                                                        |               |                                    |
| No. of cases                                               | 710    | 196              | 44               | 41                                       | 181                                    | 138               | 77                | 21                | 12               |                                                                |                                                        |               |                                    |
| Age- and area-adjusted HR (95% CI) as model 1 <sup>a</sup> |        | 1.00 (reference) | 1.22 (0.84–1.77) | 0.84 (0.43–1.63)                         | 0.97 (0.70–1.33)                       | 1.13 (0.87–1.48)  | 0.92 (0.69–1.23)  | 0.90 (0.51–1.57)  | 1.48 (0.66–3.32) | 0.235                                                          | 1.001 (0.972–1.032)                                    | 0.927         | 0.411                              |
| Multivariate-adjusted HR (95% CI) in model 2 <sup>b</sup>  |        | 1.00 (reference) | 1.26 (0.85–1.85) | 0.84 (0.43–1.63)                         | 0.96 (0.70–1.33)                       | 1.13 (0.86–1.48)  | 0.92 (0.70–1.22)  | 0.90 (0.51–1.59)  | 1.50 (0.66–3.40) | 0.226                                                          | 1.001 (0.972–1.032)                                    | 0.925         | 0.412                              |
| Multivariate-adjusted HR (95% CI) in model 3 <sup>c</sup>  |        | 1.00 (reference) | 1.19 (0.76–1.86) | 0.72 (0.43–1.21)                         | 0.92 (0.74–1.14)                       | 1.05 (0.75–1.46)  | 0.86 (0.64–1.15)  | 0.97 (0.60–1.55)  | 1.28 (0.66–2.48) | 0.482                                                          | 1.001 (0.967–1.036)                                    | 0.951         | 0.545                              |
| Multivariate-adjusted HR (95% CI) in model 4 <sup>d</sup>  |        | 1.00 (reference) | 1.34 (0.83–2.18) | 0.62 (0.36–1.07)                         | 0.89 (0.71–1.12)                       | 1.06 (0.78–1.42)  | 0.93 (0.67–1.27)  | 0.91 (0.55–1.50)  | 0.97 (0.47–2.00) | 0.925                                                          | 0.994 (0.953–1.037)                                    | 0.774         | 0.254                              |
| Multivariate-adjusted HR (95% CI) in model 5 <sup>e</sup>  |        | 1.00 (reference) | 1.22 (0.76–1.95) | 0.65 (0.34–1.23)                         | 0.89 (0.70–1.13)                       | 1.02 (0.71–1.46)  | 0.84 (0.62–1.14)  | 0.91 (0.55–1.52)  | 1.04 (0.48–2.22) | 0.920                                                          | 0.999 (0.963–1.037)                                    | 0.964         | 0.619                              |
| <b>Ever smokers</b>                                        |        |                  |                  |                                          |                                        |                   |                   |                   |                  |                                                                |                                                        |               |                                    |
| No. of subjects                                            | 77,922 | 12,964           | 6,023            | 4,389                                    | 14,993                                 | 16,323            | 14,675            | 6,018             | 2,537            |                                                                |                                                        |               |                                    |
| No. of cases                                               | 4,116  | 671              | 347              | 215                                      | 726                                    | 871               | 852               | 313               | 121              |                                                                |                                                        |               |                                    |
| Age- and area-adjusted HR (95% CI) as model 1 <sup>a</sup> |        | 1.00 (reference) | 1.16 (0.97–1.39) | 1.07 (0.84–1.36)                         | 1.04 (0.89–1.22)                       | 1.12 (1.01–1.25)  | 1.28 (1.09–1.50)  | 1.27 (0.98–1.64)  | 1.38 (1.03–1.86) | 0.097                                                          | 1.039 (1.017–1.061)                                    | $<0.001$      | 0.004                              |
| Multivariate-adjusted HR (95% CI) in model 2 <sup>b</sup>  |        | 1.00 (reference) | 1.16 (0.97–1.39) | 1.08 (0.85–1.37)                         | 1.05 (0.90–1.22)                       | 1.12 (1.01–1.25)  | 1.27 (1.09–1.49)  | 1.26 (0.98–1.62)  | 1.35 (1.01–1.81) | 0.113                                                          | 1.036 (1.015–1.058)                                    | 0.001         | 0.005                              |
| Multivariate-adjusted HR (95% CI) in model 3 <sup>c</sup>  |        | 1.00 (reference) | 1.16 (0.92–1.46) | 1.15 (0.89–1.49)                         | 1.05 (0.87–1.25)                       | 1.11 (0.98–1.26)  | 1.24 (1.06–1.46)  | 1.22 (0.92–1.62)  | 1.28 (0.94–1.72) | 0.160                                                          | 1.032 (1.009–1.056)                                    | 0.006         | 0.016                              |
| Multivariate-adjusted HR (95% CI) in model 4 <sup>d</sup>  |        | 1.00 (reference) | 1.08 (0.90–1.30) | 1.08 (0.85–1.38)                         | 1.02 (0.91–1.15)                       | 1.09 (0.98–1.22)  | 1.23 (1.08–1.40)  | 1.24 (0.98–1.57)  | 1.23 (0.98–1.56) | 0.343                                                          | 1.031 (1.013–1.050)                                    | 0.001         | 0.062                              |
| Multivariate-adjusted HR (95% CI) in model 5 <sup>e</sup>  |        | 1.00 (reference) | 1.09 (0.86–1.37) | 1.17 (0.91–1.50)                         | 1.02 (0.88–1.18)                       | 1.07 (0.95–1.20)  | 1.19 (1.04–1.37)  | 1.17 (0.92–1.48)  | 1.19 (0.89–1.58) | 0.245                                                          | 1.026 (1.005–1.048)                                    | 0.013         | 0.071                              |

<sup>a</sup>Adjusted for age and area (JPHC Study II, JACC Study, and Life Span Study only).

<sup>b</sup>Adjusted for covariates in model 1 plus smoking status (only for ever smokers, pack-years:  $<20$ , 20 to  $<40$ , and  $\geq 40$ ) and medical history of diabetes mellitus (yes, no).

<sup>c</sup>Adjusted for covariates in model 2 plus total energy intake (quartiles), vegetable intake (quartiles), fruit intake (quartiles), salt intake (quartiles), and green tea consumption (cups/day:  $<1$ , 1–2, 3–4, and  $\geq 5$ ).

<sup>d</sup>Excluding participants with stomach cancer diagnosis within 3 years from the baseline in model 2.

<sup>e</sup>Excluding participants with stomach cancer diagnosis within 3 years from the baseline in model 3.

<sup>f</sup>Indicating heterogeneity among the pooled cohort studies.

Abbreviations: CI, confidence interval; HR, hazard ratio; JACC Study, the Japan Collaborative Cohort Study; JPHC Study, the Japan Public Health Center-based Prospective Study.
