# Supplementary material for: Alcohol intake and stomach cancer risk in Japan: A pooled analysis of six cohort studies
Source: PubMed Central journal article supplement — Cancer Sci. 2021 Nov 28;113(1):261–76. doi: 10.1111/cas.15172 (PMC8748227; doi:10.1111/cas.15172), 2021-11-28
Supplement: CAS-113-261-s003.pdf [file CAS-113-261-s003.pdf]

**Supplementary TABLE 6** Results from a pooled analysis using a random-effects model for stomach cancer incidence according to alcohol intake by smoking status in Japanese women, 1988–2014, separating former drinkers from nondrinkers

|                                                            | Total  | Nondrinkers      | Former drinkers  | Occasional drinkers<br>(<once/week) | Regular drinkers (≥once/week) |                  | <i>p</i> for heterogeneity<br>for the highest category <sup>f</sup> | Alcohol intake as a continuous variable (per 10 g/day) |                    |                                         |
|------------------------------------------------------------|--------|------------------|------------------|-------------------------------------|-------------------------------|------------------|---------------------------------------------------------------------|--------------------------------------------------------|--------------------|-----------------------------------------|
|                                                            |        |                  |                  |                                     | <23 g/day                     | ≥23 g/day        |                                                                     | HR (95% CI)                                            | <i>p</i> for trend | <i>p</i> for heterogeneity <sup>f</sup> |
| <b>Nonsmokers</b>                                          |        |                  |                  |                                     |                               |                  |                                                                     |                                                        |                    |                                         |
| No. of subjects                                            | 98,765 | 77,578           | 2,283            | 7,343                               | 9,914                         | 1,647            |                                                                     |                                                        |                    |                                         |
| No. of cases                                               | 1,786  | 1,480            | 49               | 95                                  | 134                           | 28               |                                                                     |                                                        |                    |                                         |
| Age- and area-adjusted HR (95% CI) as model 1 <sup>a</sup> |        | 1.00 (reference) | 1.22 (0.88–1.69) | 0.88 (0.71–1.08)                    | 0.88 (0.74–1.05)              | 1.21 (0.83–1.76) | 0.950                                                               | 1.031 (0.949–1.119)                                    | 0.475              | 0.488                                   |
| Multivariate-adjusted HR (95% CI) in model 2 <sup>b</sup>  |        | 1.00 (reference) | 1.21 (0.87–1.69) | 0.79 (0.64–0.97)                    | 0.83 (0.69–0.99)              | 1.16 (0.79–1.68) | 0.851                                                               | 1.030 (0.948–1.119)                                    | 0.486              | 0.488                                   |
| Multivariate-adjusted HR (95% CI) in model 3 <sup>c</sup>  |        | 1.00 (reference) | 1.17 (0.69–1.97) | 0.87 (0.69–1.09)                    | 0.87 (0.71–1.08)              | 1.28 (0.87–1.90) | 0.927                                                               | 1.045 (0.958–1.141)                                    | 0.321              | 0.432                                   |
| Multivariate-adjusted HR (95% CI) in model 4 <sup>d</sup>  |        | 1.00 (reference) | 1.10 (0.78–1.56) | 0.87 (0.69–1.09)                    | 0.92 (0.76–1.11)              | 1.19 (0.79–1.80) | 0.812                                                               | 1.016 (0.928–1.113)                                    | 0.728              | 0.934                                   |
| Multivariate-adjusted HR (95% CI) in model 5 <sup>e</sup>  |        | 1.00 (reference) | 1.11 (0.69–1.78) | 0.89 (0.70–1.13)                    | 0.90 (0.70–1.14)              | 1.30 (0.85–1.99) | 0.644                                                               | 1.029 (0.934–1.133)                                    | 0.566              | 0.872                                   |
| <b>Ever smokers</b>                                        |        |                  |                  |                                     |                               |                  |                                                                     |                                                        |                    |                                         |
| No. of subjects                                            | 9,918  | 4,485            | 1,143            | 938                                 | 2,060                         | 1,292            |                                                                     |                                                        |                    |                                         |
| No. of cases                                               | 183    | 86               | 25               | 17                                  | 31                            | 24               |                                                                     |                                                        |                    |                                         |
| Age- and area-adjusted HR (95% CI) as model 1 <sup>a</sup> |        | 1.00 (reference) | 1.23 (0.78–1.93) | 1.42 (0.81–2.50)                    | 0.84 (0.45–1.54)              | 1.39 (0.86–2.25) | 0.613                                                               | 1.044 (0.967–1.126)                                    | 0.273              | 0.404                                   |
| Multivariate-adjusted HR (95% CI) in model 2 <sup>b</sup>  |        | 1.00 (reference) | 1.25 (0.79–1.97) | 1.34 (0.76–2.34)                    | 0.81 (0.48–1.36)              | 1.26 (0.78–2.03) | 0.568                                                               | 1.037 (0.956–1.123)                                    | 0.382              | 0.396                                   |
| Multivariate-adjusted HR (95% CI) in model 3 <sup>c</sup>  |        | 1.00 (reference) | 1.48 (0.79–2.76) | 1.49 (0.83–2.71)                    | 1.13 (0.61–2.08)              | 1.85 (1.05–3.25) | 0.486                                                               | 1.074 (0.986–1.170)                                    | 0.103              | 0.493                                   |
| Multivariate-adjusted HR (95% CI) in model 4 <sup>d</sup>  |        | 1.00 (reference) | 1.22 (0.65–2.28) | 1.54 (0.86–2.78)                    | 0.89 (0.51–1.56)              | 1.32 (0.78–2.24) | 0.526                                                               | 1.044 (0.959–1.135)                                    | 0.320              | 0.461                                   |
| Multivariate-adjusted HR (95% CI) in model 5 <sup>e</sup>  |        | 1.00 (reference) | 1.50 (0.69–3.23) | 1.77 (0.97–3.24)                    | 1.26 (0.71–2.22)              | 1.66 (0.86–3.22) | 0.341                                                               | 1.077 (0.981–1.183)                                    | 0.117              | 0.505                                   |

<sup>a</sup>Adjusted for age and area (JPHC Study II, JACC Study, and Life Span Study only).

<sup>b</sup>Adjusted for covariates in model 1 plus smoking status (only for ever smokers, pack-years: <20 and ≥20) and medical history of diabetes mellitus (yes, no).

<sup>c</sup>Adjusted for covariates in model 2 plus total energy intake (quartiles), vegetable intake (quartiles), fruit intake (quartiles), salt intake (quartiles), and green tea consumption (cups/day: <1, 1–2, 3–4, and ≥5).

<sup>d</sup>Excluding participants with stomach cancer diagnosis within 3 years from the baseline in model 2.

<sup>e</sup>Excluding participants with stomach cancer diagnosis within 3 years from the baseline in model 3.

<sup>f</sup>Indicating heterogeneity among the pooled cohort studies.

Abbreviations: CI, confidence interval; HR, hazard ratio; JACC Study, the Japan Collaborative Cohort Study; JPHC Study, the Japan Public Health Center-based Prospective Study.
