# Supplementary material for: Alcohol intake and stomach cancer risk in Japan: A pooled analysis of six cohort studies
Source: PubMed Central journal article supplement — Cancer Sci. 2021 Nov 28;113(1):261–76. doi: 10.1111/cas.15172 (PMC8748227; doi:10.1111/cas.15172), 2021-11-28
Supplement: CAS-113-261-s004.pdf [file CAS-113-261-s004.pdf]

**Supplementary TABLE 1** Results from a pooled analysis using a random-effects model for stomach cancer incidence by alcohol intake in Japanese men, 1988–2014, separating former drinkers from nondrinkers

| Site of cancer                                             | Total     | Nondrinkers      | Former drinkers  | Occasional drinkers<br>(<once/week) | Regular drinkers (≥once/week) |                  |                  |                  |                  | <i>p</i> for heterogeneity<br>for the highest category <sup>f</sup> | Alcohol intake as a continuous variable (per 10 g/day) |                    |                                         |  |
|------------------------------------------------------------|-----------|------------------|------------------|-------------------------------------|-------------------------------|------------------|------------------|------------------|------------------|---------------------------------------------------------------------|--------------------------------------------------------|--------------------|-----------------------------------------|--|
|                                                            |           |                  |                  |                                     | <23 g/day                     | 23 to <46 g/day  | 46 to <69 g/day  | 69 to <92 g/day  | ≥92 g/day        |                                                                     | HR (95% CI)                                            | <i>p</i> for trend | <i>p</i> for heterogeneity <sup>f</sup> |  |
| <b>Total</b>                                               |           |                  |                  |                                     |                               |                  |                  |                  |                  |                                                                     |                                                        |                    |                                         |  |
| No. of subjects                                            | 99,712    | 18,342           | 7,248            | 6,166                               | 20,623                        | 20,265           | 17,257           | 6,845            | 2,966            |                                                                     |                                                        |                    |                                         |  |
| No. of cases                                               | 4,930     | 881              | 403              | 262                                 | 932                           | 1,032            | 946              | 338              | 136              |                                                                     |                                                        |                    |                                         |  |
| Person-years                                               | 1,538,641 | 279,530          | 88,171           | 100,511                             | 325,663                       | 318,115          | 273,503          | 107,816          | 45,332           |                                                                     |                                                        |                    |                                         |  |
| Incidence rate per 100,000 person-years                    | 320       | 315              | 457              | 261                                 | 286                           | 324              | 346              | 313              | 300              |                                                                     |                                                        |                    |                                         |  |
| Age- and area-adjusted HR (95% CI) as model 1 <sup>a</sup> |           | 1.00 (reference) | 1.22 (1.04–1.44) | 1.04 (0.84–1.29)                    | 1.06 (0.90–1.26)              | 1.17 (1.04–1.32) | 1.30 (1.11–1.51) | 1.29 (1.04–1.60) | 1.44 (1.10–1.88) | 0.113                                                               | 1.039 (1.020–1.058)                                    | <0.001             | 0.005                                   |  |
| Multivariate-adjusted HR (95% CI) in model 2 <sup>b</sup>  |           | 1.00 (reference) | 1.18 (0.99–1.40) | 1.04 (0.84–1.28)                    | 1.07 (0.91–1.25)              | 1.14 (1.02–1.28) | 1.25 (1.07–1.45) | 1.22 (0.99–1.51) | 1.36 (1.03–1.79) | 0.107                                                               | 1.032 (1.015–1.049)                                    | <0.001             | 0.030                                   |  |
| Multivariate-adjusted HR (95% CI) in model 3 <sup>c</sup>  |           | 1.00 (reference) | 1.16 (0.95–1.43) | 1.03 (0.80–1.33)                    | 1.03 (0.88–1.19)              | 1.11 (1.01–1.22) | 1.19 (1.05–1.36) | 1.18 (0.96–1.45) | 1.26 (1.00–1.60) | 0.274                                                               | 1.029 (1.010–1.049)                                    | 0.003              | 0.050                                   |  |
| Multivariate-adjusted HR (95% CI) in model 4 <sup>d</sup>  |           | 1.00 (reference) | 1.13 (0.94–1.34) | 1.03 (0.82–1.31)                    | 1.06 (0.90–1.23)              | 1.11 (0.99–1.24) | 1.23 (1.06–1.42) | 1.22 (0.97–1.53) | 1.21 (0.99–1.48) | 0.466                                                               | 1.027 (1.011–1.043)                                    | 0.001              | 0.101                                   |  |
| Multivariate-adjusted HR (95% CI) in model 5 <sup>e</sup>  |           | 1.00 (reference) | 1.09 (0.91–1.31) | 1.04 (0.80–1.35)                    | 1.00 (0.89–1.12)              | 1.07 (0.96–1.19) | 1.16 (1.03–1.30) | 1.14 (0.96–1.34) | 1.17 (0.94–1.46) | 0.385                                                               | 1.025 (1.006–1.044)                                    | 0.009              | 0.078                                   |  |
| <b>Proximal (upper third)</b>                              |           |                  |                  |                                     |                               |                  |                  |                  |                  |                                                                     |                                                        |                    |                                         |  |
| No. of subjects                                            | 99,712    | 18,342           | 7,248            | 6,166                               | 20,623                        | 20,265           | 17,257           | 6,845            | 2,966            |                                                                     |                                                        |                    |                                         |  |
| No. of cases                                               | 569       | 107              | 44               | 31                                  | 103                           | 108              | 113              | 41               | 22               |                                                                     |                                                        |                    |                                         |  |
| Person-years                                               | 1,554,652 | 282,973          | 89,872           | 101,682                             | 329,854                       | 322,847          | 277,806          | 109,260          | 40,358           |                                                                     |                                                        |                    |                                         |  |
| Incidence rate per 100,000 person-years                    | 37        | 38               | 49               | 30                                  | 31                            | 33               | 41               | 38               | 55               |                                                                     |                                                        |                    |                                         |  |
| Age- and area-adjusted HR (95% CI) as model 1 <sup>a</sup> |           | 1.00 (reference) | 1.09 (0.73–1.64) | 1.01 (0.66–1.56)                    | 0.90 (0.68–1.19)              | 0.99 (0.74–1.32) | 1.22 (0.88–1.71) | 1.21 (0.82–1.79) | 1.75 (1.10–2.79) | 0.958                                                               | 1.033 (1.009–1.058)                                    | 0.008              | 0.542                                   |  |
| Multivariate-adjusted HR (95% CI) in model 2 <sup>b</sup>  |           | 1.00 (reference) | 1.01 (0.67–1.51) | 1.00 (0.65–1.52)                    | 0.90 (0.69–1.19)              | 0.96 (0.71–1.30) | 1.16 (0.84–1.59) | 1.12 (0.77–1.64) | 1.65 (1.04–2.64) | 0.974                                                               | 1.028 (1.003–1.054)                                    | 0.028              | 0.765                                   |  |
| Multivariate-adjusted HR (95% CI) in model 3 <sup>c</sup>  |           | 1.00 (reference) | 1.02 (0.68–1.54) | 0.98 (0.56–1.73)                    | 0.95 (0.63–1.44)              | 1.03 (0.67–1.57) | 1.27 (0.85–1.89) | 1.40 (0.72–2.72) | 2.14 (1.28–3.56) | 0.506                                                               | 1.034 (1.010–1.058)                                    | 0.005              | 0.500                                   |  |
| Multivariate-adjusted HR (95% CI) in model 4 <sup>d</sup>  |           | 1.00 (reference) | 1.05 (0.69–1.59) | 0.97 (0.62–1.52)                    | 0.87 (0.63–1.20)              | 1.02 (0.76–1.36) | 1.22 (0.91–1.63) | 1.19 (0.79–1.78) | 1.57 (0.92–2.68) | 0.746                                                               | 1.029 (1.003–1.056)                                    | <0.001             | 0.821                                   |  |
| Multivariate-adjusted HR (95% CI) in model 5 <sup>e</sup>  |           | 1.00 (reference) | 1.06 (0.61–1.85) | 0.92 (0.54–1.57)                    | 0.90 (0.54–1.49)              | 1.07 (0.72–1.60) | 1.33 (0.91–1.96) | 1.38 (0.70–2.74) | 2.06 (0.98–4.34) | 0.229                                                               | 1.035 (1.011–1.059)                                    | 0.004              | 0.575                                   |  |
| <b>Distal (lower two thirds)</b>                           |           |                  |                  |                                     |                               |                  |                  |                  |                  |                                                                     |                                                        |                    |                                         |  |
| No. of subjects                                            | 99,712    | 18,342           | 7,248            | 6,166                               | 20,623                        | 20,265           | 17,257           | 6,845            | 2,966            |                                                                     |                                                        |                    |                                         |  |
| No. of cases                                               | 2,775     | 469              | 207              | 160                                 | 527                           | 598              | 545              | 194              | 75               |                                                                     |                                                        |                    |                                         |  |
| Person-years                                               | 1,548,463 | 281,274          | 88,987           | 100,959                             | 327,580                       | 320,147          | 275,412          | 108,488          | 45,616           |                                                                     |                                                        |                    |                                         |  |
| Incidence rate per 100,000 person-years                    | 179       | 167              | 233              | 158                                 | 161                           | 187              | 198              | 179              | 164              |                                                                     |                                                        |                    |                                         |  |
| Age- and area-adjusted HR (95% CI) as model 1 <sup>a</sup> |           | 1.00 (reference) | 1.21 (1.02–1.43) | 1.17 (0.85–1.61)                    | 1.08 (0.88–1.32)              | 1.30 (1.05–1.63) | 1.42 (1.12–1.79) | 1.34 (1.01–1.77) | 1.33 (0.94–1.87) | 0.172                                                               | 1.040 (1.018–1.062)                                    | <0.001             | 0.037                                   |  |
| Multivariate-adjusted HR (95% CI) in model 2 <sup>b</sup>  |           | 1.00 (reference) | 1.17 (0.99–1.39) | 1.16 (0.85–1.60)                    | 1.08 (0.99–1.30)              | 1.27 (1.02–1.57) | 1.36 (1.08–1.71) | 1.27 (0.95–1.68) | 1.25 (0.89–1.76) | 0.176                                                               | 1.033 (1.013–1.053)                                    | 0.001              | 0.069                                   |  |
| Multivariate-adjusted HR (95% CI) in model 3 <sup>c</sup>  |           | 1.00 (reference) | 1.16 (0.97–1.40) | 1.23 (0.82–1.85)                    | 1.02 (0.86–1.21)              | 1.22 (0.98–1.52) | 1.29 (1.01–1.66) | 1.21 (0.90–1.63) | 1.09 (0.83–1.43) | 0.396                                                               | 1.026 (1.005–1.048)                                    | 0.016              | 0.127                                   |  |
| Multivariate-adjusted HR (95% CI) in model 4 <sup>d</sup>  |           | 1.00 (reference) | 1.17 (0.95–1.44) | 1.22 (0.84–1.78)                    | 1.14 (0.91–1.43)              | 1.28 (1.01–1.62) | 1.37 (1.04–1.82) | 1.28 (0.96–1.71) | 1.12 (0.85–1.47) | 0.713                                                               | 1.026 (1.006–1.046)                                    | 0.010              | 0.130                                   |  |
| Multivariate-adjusted HR (95% CI) in model 5 <sup>e</sup>  |           | 1.00 (reference) | 1.12 (0.92–1.37) | 1.30 (0.81–2.09)                    | 1.06 (0.86–1.30)              | 1.18 (0.95–1.46) | 1.25 (0.96–1.62) | 1.16 (0.90–1.50) | 1.05 (0.78–1.40) | 0.497                                                               | 1.019 (1.001–1.038)                                    | 0.044              | 0.277                                   |  |

<sup>a</sup>Adjusted for age and area (JPHC Study II, JACC Study, and Life Span Study only).

<sup>b</sup>Adjusted for covariates in model 1 plus smoking status (pack-years: 0, <20, 20 to <40, and ≥40) and medical history of diabetes mellitus (yes, no).

<sup>c</sup>Adjusted for covariates in model 2 plus total energy intake (quartiles), vegetable intake (quartiles), fruit intake (quartiles), salt intake (quartiles), and green tea consumption (cups/day: <1, 1–2, 3–4, and ≥5).

<sup>d</sup>Excluding participants with stomach cancer diagnosis within 3 years from the baseline in model 2.

<sup>e</sup>Excluding participants with stomach cancer diagnosis within 3 years from the baseline in model 3.

<sup>f</sup>Indicating heterogeneity among the pooled cohort studies.

Abbreviations: CI, confidence interval; HR, hazard ratio; JACC Study, the Japan Collaborative Cohort Study; JPHC Study, the Japan Public Health Center-based Prospective Study.
