# Supplementary material for: Alcohol intake and stomach cancer risk in Japan: A pooled analysis of six cohort studies
Source: PubMed Central journal article supplement — Cancer Sci. 2021 Nov 28;113(1):261–76. doi: 10.1111/cas.15172 (PMC8748227; doi:10.1111/cas.15172), 2021-11-28
Supplement: CAS-113-261-s005.pdf [file CAS-113-261-s005.pdf]

**Supplementary TABLE 2** Results from a pooled analysis using a random-effects model for stomach cancer incidence by alcohol intake in Japanese women, 1988–2014, separating former drinkers from nondrinkers

| Site of cancer                                             | Total     | Nondrinkers      | Former drinkers   | Occasional drinkers<br>(<once/week) | Regular drinkers (≥once/week) |                  | <i>p</i> for heterogeneity<br>for the highest category <sup>f</sup> | Alcohol intake as a continuous variable (per 10 g/day) |                    |                                         |
|------------------------------------------------------------|-----------|------------------|-------------------|-------------------------------------|-------------------------------|------------------|---------------------------------------------------------------------|--------------------------------------------------------|--------------------|-----------------------------------------|
|                                                            |           |                  |                   |                                     | <23 g/day                     | ≥23 g/day        |                                                                     | HR (95% CI)                                            | <i>p</i> for trend | <i>p</i> for heterogeneity <sup>f</sup> |
| <b>Total</b>                                               |           |                  |                   |                                     |                               |                  |                                                                     |                                                        |                    |                                         |
| No. of subjects                                            | 114,894   | 86,186           | 3,717             | 9,029                               | 12,835                        | 3,127            |                                                                     |                                                        |                    |                                         |
| No. of cases                                               | 2,096     | 1,650            | 79                | 129                                 | 179                           | 59               |                                                                     |                                                        |                    |                                         |
| Person-years                                               | 1,848,947 | 1,396,166        | 48,028            | 152,650                             | 204,602                       | 47,501           |                                                                     |                                                        |                    |                                         |
| Incidence rate per 100,000 person-years                    | 113       | 118              | 164               | 85                                  | 87                            | 124              |                                                                     |                                                        |                    |                                         |
| Age- and area-adjusted HR (95% CI) as model 1 <sup>a</sup> |           | 1.00 (reference) | 1.21 (0.89–1.65)  | 0.95 (0.79–1.14)                    | 0.88 (0.70–1.09)              | 1.38 (1.07–1.80) | 0.975                                                               | 1.049 (0.998–1.103)                                    | 0.059              | 0.669                                   |
| Multivariate-adjusted HR (95% CI) in model 2 <sup>b</sup>  |           | 1.00 (reference) | 1.17 (0.90–1.52)  | 0.86 (0.72–1.04)                    | 0.82 (0.70–0.96)              | 1.26 (0.96–1.64) | 0.678                                                               | 1.045 (0.987–1.106)                                    | 0.132              | 0.347                                   |
| Multivariate-adjusted HR (95% CI) in model 3 <sup>c</sup>  |           | 1.00 (reference) | 1.14 (0.78–1.68)  | 0.97 (0.80–1.17)                    | 0.88 (0.69–1.13)              | 1.41 (1.06–1.88) | 0.818                                                               | 1.056 (1.000–1.114)                                    | 0.050              | 0.451                                   |
| Multivariate-adjusted HR (95% CI) in model 4 <sup>d</sup>  |           | 1.00 (reference) | 1.10 (0.88–1.53)  | 0.95 (0.78–1.15)                    | 0.91 (0.74–1.12)              | 1.26 (0.94–1.70) | 0.588                                                               | 1.030 (0.972–1.092)                                    | 0.316              | 0.782                                   |
| Multivariate-adjusted HR (95% CI) in model 5 <sup>e</sup>  |           | 1.00 (reference) | 1.14 (0.74–1.74)  | 0.99 (0.81–1.22)                    | 0.93 (0.72–1.19)              | 1.32 (0.92–1.91) | 0.269                                                               | 1.038 (0.978–1.100)                                    | 0.220              | 0.776                                   |
| <b>Proximal (upper third)</b>                              |           |                  |                   |                                     |                               |                  |                                                                     |                                                        |                    |                                         |
| No. of subjects                                            | 114,894   | 86,186           | 3,717             | 9,029                               | 12,835                        | 3,127            |                                                                     |                                                        |                    |                                         |
| No. of cases                                               | 133       | 103              | 6                 | 7                                   | 12                            | 5                |                                                                     |                                                        |                    |                                         |
| Person-years                                               | 1,859,346 | 1,404,323        | 48,372            | 153,304                             | 205,527                       | 47,820           |                                                                     |                                                        |                    |                                         |
| Incidence rate per 100,000 person-years                    | 7         | 7                | 12                | 5                                   | 6                             | 10               |                                                                     |                                                        |                    |                                         |
| Age- and area-adjusted HR (95% CI) as model 1 <sup>a</sup> |           | 1.00 (reference) | 1.95 (0.56–6.79)  | 1.18 (0.33–4.17)                    | 1.44 (0.77–2.69)              | 2.00 (0.80–4.98) | 0.916                                                               | 1.026 (0.866–1.214)                                    | 0.769              | 0.961                                   |
| Multivariate-adjusted HR (95% CI) in model 2 <sup>b</sup>  |           | 1.00 (reference) | 2.14 (0.55–8.38)  | 1.05 (0.45–2.42)                    | 1.30 (0.69–2.44)              | 2.04 (0.81–5.18) | 0.770                                                               | 1.039 (0.868–1.242)                                    | 0.679              | 0.935                                   |
| Multivariate-adjusted HR (95% CI) in model 3 <sup>c</sup>  |           | 1.00 (reference) | 2.34 (0.46–11.98) | 1.17 (0.32–4.28)                    | 1.51 (0.76–3.01)              | 2.37 (0.93–6.09) | 0.910                                                               | 1.087 (0.882–1.338)                                    | 0.435              | 0.900                                   |
| Multivariate-adjusted HR (95% CI) in model 4 <sup>d</sup>  |           | 1.00 (reference) | 3.86 (0.51–29.40) | 1.24 (0.40–3.79)                    | 1.51 (0.75–3.01)              | 2.19 (0.78–6.18) | 0.866                                                               | 1.055 (0.855–1.302)                                    | 0.616              | 0.917                                   |
| Multivariate-adjusted HR (95% CI) in model 5 <sup>e</sup>  |           | 1.00 (reference) | -                 | 1.23 (0.39–3.85)                    | 1.49 (0.69–3.20)              | 2.41 (0.84–6.90) | 0.908                                                               | 1.101 (0.881–1.374)                                    | 0.397              | 0.879                                   |
| <b>Distal (lower two thirds)</b>                           |           |                  |                   |                                     |                               |                  |                                                                     |                                                        |                    |                                         |
| No. of subjects                                            | 114,894   | 86,186           | 3,717             | 9,029                               | 12,835                        | 3,127            |                                                                     |                                                        |                    |                                         |
| No. of cases                                               | 1,139     | 891              | 40                | 78                                  | 97                            | 33               |                                                                     |                                                        |                    |                                         |
| Person-years                                               | 1,853,627 | 1,399,831        | 48,223            | 152,895                             | 205,039                       | 47,639           |                                                                     |                                                        |                    |                                         |
| Incidence rate per 100,000 person-years                    | 61        | 64               | 83                | 51                                  | 47                            | 69               |                                                                     |                                                        |                    |                                         |
| Age- and area-adjusted HR (95% CI) as model 1 <sup>a</sup> |           | 1.00 (reference) | 1.14 (0.73–1.78)  | 0.99 (0.78–1.25)                    | 0.81 (0.57–1.16)              | 1.39 (0.98–1.97) | 0.817                                                               | 1.062 (1.005–1.122)                                    | 0.033              | 0.795                                   |
| Multivariate-adjusted HR (95% CI) in model 2 <sup>b</sup>  |           | 1.00 (reference) | 1.00 (0.71–1.40)  | 0.92 (0.73–1.16)                    | 0.78 (0.59–1.03)              | 1.29 (0.90–1.85) | 0.701                                                               | 1.059 (0.999–1.124)                                    | 0.055              | 0.613                                   |
| Multivariate-adjusted HR (95% CI) in model 3 <sup>c</sup>  |           | 1.00 (reference) | 1.07 (0.59–1.95)  | 1.00 (0.77–1.28)                    | 0.84 (0.56–1.26)              | 1.39 (0.94–2.04) | 0.856                                                               | 1.064 (0.998–1.135)                                    | 0.059              | 0.837                                   |
| Multivariate-adjusted HR (95% CI) in model 4 <sup>d</sup>  |           | 1.00 (reference) | 0.98 (0.60–1.58)  | 0.97 (0.75–1.24)                    | 0.83 (0.56–1.24)              | 1.40 (0.96–2.05) | 0.825                                                               | 1.069 (1.006–1.136)                                    | 0.031              | 0.785                                   |
| Multivariate-adjusted HR (95% CI) in model 5 <sup>e</sup>  |           | 1.00 (reference) | 1.17 (0.63–2.17)  | 1.00 (0.77–1.31)                    | 0.89 (0.57–1.38)              | 1.46 (0.98–2.19) | 0.700                                                               | 1.072 (1.005–1.143)                                    | 0.034              | 0.731                                   |

<sup>a</sup>Adjusted for age and area (JPHC Study II, JACC Study, and Life Span Study only).

<sup>b</sup>Adjusted for covariates in model 1 plus smoking status (pack-years: 0, <20, and ≥20) and medical history of diabetes mellitus (yes, no).

<sup>c</sup>Adjusted for covariates in model 2 plus total energy intake (quartiles), vegetable intake (quartiles), fruit intake (quartiles), salt intake (quartiles), and green tea consumption (cups/day: <1, 1–2, 3–4, and ≥5).

<sup>d</sup>Excluding participants with stomach cancer diagnosis within 3 years from the baseline in model 2.

<sup>e</sup>Excluding participants with stomach cancer diagnosis within 3 years from the baseline in model 3.

<sup>f</sup>Indicating heterogeneity among the pooled cohort studies.

Abbreviations: CI, confidence interval; HR, hazard ratio; JACC Study, the Japan Collaborative Cohort Study; JPHC Study, the Japan Public Health Center-based Prospective Study.
