# Supplementary material for: Alcohol intake and stomach cancer risk in Japan: A pooled analysis of six cohort studies
Source: PubMed Central journal article supplement — Cancer Sci. 2021 Nov 28;113(1):261–76. doi: 10.1111/cas.15172 (PMC8748227; doi:10.1111/cas.15172), 2021-11-28
Supplement: CAS-113-261-s006.pdf [file CAS-113-261-s006.pdf]

**Supplementary TABLE 5** Results from a pooled analysis using a random-effects model for stomach cancer incidence according to alcohol intake by smoking status in Japanese women, 1988–2014

|                                                            | Total   | Nondrinkers      | Occasional drinkers<br>(<once/week) | Regular drinkers (≥once/week) |                  | <i>p</i> for heterogeneity<br>for the highest category <sup>f</sup> | Alcohol intake as a continuous variable (per 10 g/day) |                    |                                         |
|------------------------------------------------------------|---------|------------------|-------------------------------------|-------------------------------|------------------|---------------------------------------------------------------------|--------------------------------------------------------|--------------------|-----------------------------------------|
|                                                            |         |                  |                                     | <23 g/day                     | ≥23 g/day        |                                                                     | HR (95% CI)                                            | <i>p</i> for trend | <i>p</i> for heterogeneity <sup>f</sup> |
| <b>Nonsmokers</b>                                          |         |                  |                                     |                               |                  |                                                                     |                                                        |                    |                                         |
| No. of subjects                                            | 118,705 | 95,580           | 9,611                               | 11,005                        | 2,509            |                                                                     |                                                        |                    |                                         |
| No. of cases                                               | 2,195   | 1,837            | 148                                 | 161                           | 49               |                                                                     |                                                        |                    |                                         |
| Age- and area-adjusted HR (95% CI) as model 1 <sup>a</sup> |         | 1.00 (reference) | 0.97 (0.80–1.16)                    | 0.91 (0.77–1.07)              | 1.25 (0.94–1.66) | 0.973                                                               | 1.010 (0.970–1.051)                                    | 0.646              | 0.946                                   |
| Multivariate-adjusted HR (95% CI) in model 2 <sup>b</sup>  |         | 1.00 (reference) | 0.88 (0.74–1.05)                    | 0.85 (0.73–1.01)              | 1.16 (0.87–1.54) | 0.919                                                               | 1.010 (0.970–1.051)                                    | 0.644              | 0.945                                   |
| Multivariate-adjusted HR (95% CI) in model 3 <sup>c</sup>  |         | 1.00 (reference) | 0.96 (0.78–1.18)                    | 0.92 (0.76–1.11)              | 1.29 (0.96–1.73) | 0.974                                                               | 1.011 (0.970–1.053)                                    | 0.599              | 0.967                                   |
| Multivariate-adjusted HR (95% CI) in model 4 <sup>d</sup>  |         | 1.00 (reference) | 0.98 (0.81–1.19)                    | 0.96 (0.80–1.14)              | 1.28 (0.94–1.74) | 0.865                                                               | 1.007 (0.964–1.052)                                    | 0.751              | 0.971                                   |
| Multivariate-adjusted HR (95% CI) in model 5 <sup>e</sup>  |         | 1.00 (reference) | 0.99 (0.80–1.23)                    | 0.95 (0.77–1.16)              | 1.35 (0.99–1.84) | 0.787                                                               | 1.010 (0.966–1.056)                                    | 0.671              | 0.972                                   |
| <b>Ever smokers</b>                                        |         |                  |                                     |                               |                  |                                                                     |                                                        |                    |                                         |
| No. of subjects                                            | 11,632  | 6,514            | 1,286                               | 2,199                         | 1,633            |                                                                     |                                                        |                    |                                         |
| No. of cases                                               | 210     | 123              | 21                                  | 35                            | 31               |                                                                     |                                                        |                    |                                         |
| Age- and area-adjusted HR (95% CI) as model 1 <sup>a</sup> |         | 1.00 (reference) | 1.35 (0.82–2.21)                    | 0.93 (0.55–1.56)              | 1.40 (0.92–2.13) | 0.652                                                               | 1.048 (0.967–1.136)                                    | 0.253              | 0.284                                   |
| Multivariate-adjusted HR (95% CI) in model 2 <sup>b</sup>  |         | 1.00 (reference) | 1.26 (0.77–2.06)                    | 0.88 (0.55–1.42)              | 1.25 (0.82–1.90) | 0.579                                                               | 1.036 (0.949–1.130)                                    | 0.430              | 0.239                                   |
| Multivariate-adjusted HR (95% CI) in model 3 <sup>c</sup>  |         | 1.00 (reference) | 1.42 (0.84–2.37)                    | 1.24 (0.75–2.06)              | 1.83 (1.13–2.98) | 0.563                                                               | 1.084 (0.996–1.179)                                    | 0.061              | 0.334                                   |
| Multivariate-adjusted HR (95% CI) in model 4 <sup>d</sup>  |         | 1.00 (reference) | 1.42 (0.85–2.37)                    | 1.00 (0.63–1.59)              | 1.33 (0.84–2.10) | 0.541                                                               | 1.045 (0.958–1.140)                                    | 0.284              | 0.322                                   |
| Multivariate-adjusted HR (95% CI) in model 5 <sup>e</sup>  |         | 1.00 (reference) | 1.61 (0.95–2.72)                    | 1.34 (0.84–2.15)              | 1.67 (0.98–2.86) | 0.389                                                               | 1.086 (0.990–1.190)                                    | 0.080              | 0.328                                   |

<sup>a</sup>Adjusted for age and area (JPHC Study I, JPHC Study II, JACC Study, and Life Span Study only).

<sup>b</sup>Adjusted for covariates in model 1 plus smoking status (only for ever smokers, pack-years: <20 and ≥20) and medical history of diabetes mellitus (yes, no).

<sup>c</sup>Adjusted for covariates in model 2 plus total energy intake (quartiles), vegetable intake (quartiles), fruit intake (quartiles), salt intake (quartiles), and green tea consumption (cups/day: <1, 1–2, 3–4, and ≥5).

<sup>d</sup>Excluding participants with stomach cancer diagnosis within 3 years from the baseline in model 2.

<sup>e</sup>Excluding participants with stomach cancer diagnosis within 3 years from the baseline in model 3.

<sup>f</sup>Indicating heterogeneity among the pooled cohort studies.

Abbreviations: CI, confidence interval; HR, hazard ratio; JACC Study, the Japan Collaborative Cohort Study; JPHC Study, the Japan Public Health Center-based Prospective Study.
